# Supplementary material for: A Comprehensive Study on the Influence of Superheated Steam Treatment on Lipolytic Enzymes, Physicochemical Characteristics, and Volatile Composition of Lightly Milled Rice
Source: MDPI journal article supplement (doi:10.3390/foods13020240), 2024-01-11
Supplement: s1 [file s1]

## Supplementary Materials

# A Comprehensive Study on the Influence of Superheated Steam Treatment on Lipolytic Enzymes, Physicochemical Characteristics, and Volatile Composition of Lightly Milled Rice

Chenguang Zhou <sup>1</sup>, Bin Li <sup>1</sup>, Wenli Yang <sup>1</sup>, Tianrui Liu <sup>1</sup>, Haoran Yu <sup>1</sup> and Siyao Liu <sup>2,\*</sup>, Zhen Yang <sup>3,\*</sup>

<sup>1</sup> Agricultural Product Processing and Storage Lab, School of Food and Biological Engineering, Jiangsu University, Zhenjiang 212013, China

<sup>2</sup> School of Pharmacy, Jiangsu University, Zhenjiang 212013, China

<sup>3</sup> Key Laboratory of Nuclear Agricultural Sciences of Ministry of Agriculture and Zhejiang Province, Institute of Nuclear Agricultural Sciences, Zhejiang University, Hangzhou 310058, China

\* Correspondence: siyaoliu@ujs.edu.cn (S.L.); zhen.yang@zju.edu.cn (Z.Y.)

**Table S1** List of volatiles (ng/g) identified by HS-SPME-GC/MS for the untreated LMR and SS-treated LMR under 120 °C.

| Volatile compounds     | RT     | RI <sub>cal</sub> <sup>1</sup> | RI <sub>ref</sub> <sup>2</sup> | CK                       | 120-2                   | 120-4                    | 120-6                    | 120-8                   |
|------------------------|--------|--------------------------------|--------------------------------|--------------------------|-------------------------|--------------------------|--------------------------|-------------------------|
| <b>Alkanes</b>         |        |                                |                                |                          |                         |                          |                          |                         |
| 5-Methylundecane       | 9.875  | 1142                           | 1152                           | 9.36±1.40 <sup>a</sup>   | 5.35±0.68 <sup>c</sup>  | 9.32±0.91 <sup>ab</sup>  | 6.67±0.24 <sup>c</sup>   | 7.16±0.63 <sup>bc</sup> |
| Dodecane               | 11.655 | 1194                           |                                | 29.83±3.05 <sup>a</sup>  | 16.86±1.88 <sup>b</sup> | 25.05±2.26 <sup>ab</sup> | 17.88±0.70 <sup>b</sup>  | 19.70±2.55 <sup>b</sup> |
| Tetradecane            | 18.02  | 1393                           |                                | 7.16±0.28 <sup>a</sup>   | 3.84±0.40 <sup>c</sup>  | 6.33±0.57 <sup>ab</sup>  | 5.38±0.82 <sup>bc</sup>  | 4.50±0.65 <sup>c</sup>  |
| Pentadecane            | 20.82  | 1494                           |                                | 5.55±0.47 <sup>a</sup>   | 4.34±0.72 <sup>b</sup>  | 4.57±0.18 <sup>ab</sup>  | 4.02±0.16 <sup>b</sup>   | 3.79±0.09 <sup>b</sup>  |
| <b>Alkenes</b>         |        |                                |                                |                          |                         |                          |                          |                         |
| D-Limonene             | 11.245 | 1182                           |                                | 5.57±0.41 <sup>a</sup>   | 2.43±0.25 <sup>c</sup>  | 4.28±0.27 <sup>b</sup>   | 3.86±0.54 <sup>b</sup>   | 4.25±0.21 <sup>b</sup>  |
| cis-5-Tridecene        | 15.36  | 1306                           |                                | 0.58±0.10 <sup>a</sup>   | 0.21±0.03 <sup>b</sup>  | 0.24±0.04 <sup>b</sup>   | 0.27±0.03 <sup>b</sup>   | 0.27±0.03 <sup>b</sup>  |
| <b>Alcohols</b>        |        |                                |                                |                          |                         |                          |                          |                         |
| 2-Propyl-1-pentanol    | 6.515  | 1043                           |                                | 1.60±0.16 <sup>a</sup>   | 0.93±0.10 <sup>b</sup>  | 1.14±0.08 <sup>b</sup>   | 1.04±0.05 <sup>b</sup>   | 1.12±0.08 <sup>b</sup>  |
| 2-Propyl-1-heptanol    | 9.005  | 1116                           |                                | 1.69±0.26 <sup>a</sup>   | 0.83±0.04 <sup>b</sup>  | 0.86±0.09 <sup>b</sup>   | 0.80±0.05 <sup>b</sup>   | 0.79±0.06 <sup>b</sup>  |
| 5-Ethyl-2-nonanol      | 9.145  | 1120                           |                                | 1.10±0.17 <sup>a</sup>   | 0.40±0.04 <sup>c</sup>  | 0.73±0.07 <sup>b</sup>   | 0.57±0.05 <sup>bc</sup>  | 0.61±0.07 <sup>b</sup>  |
| 3-Methyl-1-butanol     | 11.895 | 1201                           | 1202                           | 4.30±0.54 <sup>a</sup>   | 2.61±0.32 <sup>b</sup>  | 2.95±0.13 <sup>b</sup>   | 2.45±0.18 <sup>b</sup>   | 2.27±0.18 <sup>b</sup>  |
| 2-Hexanol              | 12.37  | 1215                           | 1217                           | 0.54±0.07 <sup>ab</sup>  | 0.43±0.02 <sup>c</sup>  | 0.64±0.05 <sup>a</sup>   | 0.52±0.02 <sup>bc</sup>  | 0.58±0.04 <sup>bc</sup> |
| 1-Pentanol             | 13.25  | 1242                           | 1241                           | 25.14±1.27 <sup>a</sup>  | 11.47±0.86 <sup>b</sup> | 9.72±0.32 <sup>bc</sup>  | 8.73±0.32 <sup>cd</sup>  | 7.90±0.38 <sup>d</sup>  |
| 2-Heptanol             | 15.445 | 1308                           | 1310                           | 2.43±0.21 <sup>a</sup>   | 1.38±0.06 <sup>b</sup>  | 1.35±0.17 <sup>b</sup>   | 1.10±0.07 <sup>bc</sup>  | 0.93±0.06 <sup>c</sup>  |
| 1-Hexanol              | 16.415 | 1340                           | 1340                           | 137.62±8.23 <sup>a</sup> | 68.69±4.54 <sup>b</sup> | 61.58±2.06 <sup>bc</sup> | 55.23±1.32 <sup>bc</sup> | 50.80±3.37 <sup>c</sup> |
| 1-Octen-3-ol           | 19.225 | 1436                           | 1436                           | 7.81±0.24 <sup>a</sup>   | 4.16±0.26 <sup>bc</sup> | 4.44±0.14 <sup>b</sup>   | 3.77±0.25 <sup>c</sup>   | 3.70±0.29 <sup>c</sup>  |
| 1-Heptanol             | 19.34  | 1440                           | 1440                           | 11.76±0.57 <sup>a</sup>  | 5.52±0.55 <sup>b</sup>  | 5.39±0.32 <sup>b</sup>   | 5.17±0.22 <sup>b</sup>   | 4.81±0.35 <sup>b</sup>  |
| 6-Methyl-5-hepten-2-ol | 19.565 | 1448                           | 1451                           | 7.13±0.48 <sup>a</sup>   | 4.61±0.52 <sup>b</sup>  | 4.86±0.35 <sup>b</sup>   | 4.65±0.11 <sup>b</sup>   | 4.54±0.17 <sup>b</sup>  |
| 1-Octanol              | 22.11  | 1544                           | 1545                           | 10.33±0.62 <sup>a</sup>  | 5.70±0.48 <sup>b</sup>  | 6.21±0.43 <sup>b</sup>   | 5.94±0.34 <sup>b</sup>   | 6.01±0.55 <sup>b</sup>  |
| 1-Nonanol              | 24.72  | 1648                           | 1649                           | 4.00±0.65 <sup>a</sup>   | 3.30±0.58 <sup>a</sup>  | 4.12±0.22 <sup>a</sup>   | 3.78±0.75 <sup>a</sup>   | 3.89±0.90 <sup>a</sup>  |
| 1-Tetradecanol         | 35.975 | 2152                           | 2152                           | 1.35±0.27 <sup>a</sup>   | 0.96±0.22 <sup>ab</sup> | 0.85±0.13 <sup>ab</sup>  | 0.61±0.07 <sup>b</sup>   | 0.92±0.02 <sup>ab</sup> |
| <b>Aldehydes</b>       |        |                                |                                |                          |                         |                          |                          |                         |

|                         |        |      |      |                         |                         |                         |                         |                         |
|-------------------------|--------|------|------|-------------------------|-------------------------|-------------------------|-------------------------|-------------------------|
| Hexanal                 | 7.525  | 1072 | 1072 | 21.78±1.37 <sup>a</sup> | 12.07±1.04 <sup>b</sup> | 11.21±0.30 <sup>b</sup> | 10.13±0.50 <sup>b</sup> | 10.49±0.76 <sup>b</sup> |
| Heptanal                | 10.955 | 1173 | 1176 | 3.30±0.06 <sup>a</sup>  | 1.54±0.10 <sup>b</sup>  | 1.42±0.06 <sup>b</sup>  | 1.24±0.10 <sup>bc</sup> | 1.08±0.11 <sup>c</sup>  |
| 2-Hexenal               | 13.065 | 1236 | 1248 | 4.44±0.36 <sup>a</sup>  | 1.87±0.12 <sup>c</sup>  | 3.08±0.35 <sup>b</sup>  | 2.24±0.05 <sup>c</sup>  | 2.40±0.16 <sup>bc</sup> |
| Octanal                 | 14.34  | 1274 | 1275 | 5.02±0.14 <sup>a</sup>  | 1.80±0.18 <sup>b</sup>  | 1.78±0.35 <sup>b</sup>  | 1.35±0.09 <sup>b</sup>  | 1.36±0.07 <sup>b</sup>  |
| trans-2-Heptenal        | 15.295 | 1303 | 1306 | 2.31±0.07 <sup>a</sup>  | 0.77±0.11 <sup>bc</sup> | 0.92±0.10 <sup>b</sup>  | 0.59±0.11 <sup>c</sup>  | 0.58±0.07 <sup>c</sup>  |
| Nonanal                 | 17.525 | 1377 | 1379 | 13.83±0.21 <sup>a</sup> | 7.92±0.41 <sup>b</sup>  | 13.58±0.95 <sup>a</sup> | 11.16±1.21 <sup>a</sup> | 11.47±0.60 <sup>a</sup> |
| trans-2-Octenal         | 18.445 | 1408 | 1412 | 4.28±0.52 <sup>a</sup>  | 0.71±0.10 <sup>b</sup>  | 0.68±0.11 <sup>b</sup>  | 0.46±0.05 <sup>b</sup>  | 0.55±0.10 <sup>b</sup>  |
| Decanal                 | 20.515 | 1483 | 1483 | 1.69±0.08 <sup>a</sup>  | 0.93±0.12 <sup>c</sup>  | 1.70±0.36 <sup>ab</sup> | 1.27±0.19 <sup>bc</sup> | 1.01±0.12 <sup>bc</sup> |
| trans-2-Decenal         | 24.21  | 1627 | 1629 | 2.66±0.16 <sup>a</sup>  | 0.77±0.10 <sup>b</sup>  | 0.84±0.06 <sup>b</sup>  | 0.83±0.05 <sup>b</sup>  | 0.80±0.04 <sup>b</sup>  |
| 2-Undecenal             | 26.855 | 1738 | 1740 | 0.52±0.06 <sup>a</sup>  | 0.17±0.04 <sup>d</sup>  | 0.31±0.03 <sup>c</sup>  | 0.34±0.02 <sup>bc</sup> | 0.44±0.06 <sup>ab</sup> |
| <b>Esters</b>           |        |      |      |                         |                         |                         |                         |                         |
| Gamma-Hexanolactone     | 25.41  | 1677 | 1678 | 2.58±0.25 <sup>a</sup>  | 0.37±0.05 <sup>b</sup>  | 0.11±0.02 <sup>b</sup>  | 0.13±0.01 <sup>b</sup>  | 0.04±0.01 <sup>b</sup>  |
| Gamma-Octalactone       | 30.385 | 1891 | 1889 | 2.97±0.14 <sup>a</sup>  | 0.67±0.12 <sup>b</sup>  | 0.69±0.07 <sup>b</sup>  | 0.58±0.07 <sup>b</sup>  | 0.54±0.07 <sup>b</sup>  |
| Gamma-Nonanolactone     | 32.81  | 2000 | 2003 | 3.86±0.11 <sup>a</sup>  | 1.62±0.16 <sup>b</sup>  | 1.38±0.02 <sup>bc</sup> | 1.36±0.18 <sup>cd</sup> | 1.24±0.09 <sup>d</sup>  |
| Diisobutyl phthalate    | 42.575 | 2470 | 2526 | 0.49±0.09 <sup>c</sup>  | 1.27±0.16 <sup>b</sup>  | 2.18±0.27 <sup>a</sup>  | 1.03±0.25 <sup>bc</sup> | 0.89±0.12 <sup>bc</sup> |
| Dibutyl phthalate       | 44.995 | 2586 | 2592 | 1.17±0.43 <sup>c</sup>  | 3.05±0.62 <sup>bc</sup> | 4.84±0.76 <sup>a</sup>  | 3.60±0.35 <sup>ab</sup> | 2.63±0.45 <sup>bc</sup> |
| <b>Ketones</b>          |        |      |      |                         |                         |                         |                         |                         |
| 2-Heptanone             | 10.865 | 1171 | 1172 | 7.80±0.68 <sup>a</sup>  | 5.41±0.35 <sup>b</sup>  | 4.14±0.15 <sup>c</sup>  | 3.41±0.13 <sup>cd</sup> | 3.00±0.10 <sup>d</sup>  |
| 6-Methyl-2-heptanone    | 12.71  | 1225 | 1228 | 1.66±0.10 <sup>a</sup>  | 0.91±0.13 <sup>b</sup>  | 0.77±0.02 <sup>b</sup>  | 0.70±0.02 <sup>b</sup>  | 0.67±0.05 <sup>b</sup>  |
| 2-Octanone              | 14.21  | 1270 | 1275 | 4.50±0.36 <sup>a</sup>  | 2.49±0.17 <sup>c</sup>  | 3.16±0.27 <sup>b</sup>  | 2.58±0.12 <sup>bc</sup> | 2.49±0.16 <sup>bc</sup> |
| 1-Decen-3-one           | 14.71  | 1286 |      | 0.53±0.06 <sup>a</sup>  | 0.29±0.03 <sup>b</sup>  | 0.41±0.08 <sup>b</sup>  | 0.23±0.04 <sup>b</sup>  | 0.36±0.06 <sup>b</sup>  |
| 2,5-Octanedione         | 15.52  | 1311 | 1325 | 0.16±0.03 <sup>b</sup>  | 0.31±0.02 <sup>a</sup>  | 0.25±0.03 <sup>a</sup>  | 0.17±0.02 <sup>b</sup>  | 0.19±0.03 <sup>b</sup>  |
| 6-Methyl-5-hepten-2-one | 15.825 | 1321 | 1323 | 17.68±1.55 <sup>a</sup> | 9.77±0.53 <sup>b</sup>  | 10.65±0.51 <sup>b</sup> | 9.25±0.26 <sup>b</sup>  | 9.07±0.56 <sup>b</sup>  |
| 2,7-Octanedione         | 15.94  | 1325 |      | 0.55±0.07 <sup>a</sup>  | 0.19±0.03 <sup>b</sup>  | 0.06±0.01 <sup>c</sup>  | 0.11±0.01 <sup>bc</sup> | 0.13±0.01 <sup>bc</sup> |
| 2-Nonanone              | 17.385 | 1372 | 1374 | 1.32±0.08 <sup>a</sup>  | 0.48±0.08 <sup>b</sup>  | 0.48±0.06 <sup>b</sup>  | 0.47±0.09 <sup>b</sup>  | 0.41±0.06 <sup>b</sup>  |
| 2,15-Hexadecanedione    | 18.315 | 1403 |      | 2.62±0.48 <sup>a</sup>  | 0.35±0.02 <sup>b</sup>  | 0.34±0.05 <sup>b</sup>  | 0.29±0.03 <sup>b</sup>  | 0.35±0.06 <sup>b</sup>  |

|                       |        |      |      |                         |                         |                         |                         |                         |
|-----------------------|--------|------|------|-------------------------|-------------------------|-------------------------|-------------------------|-------------------------|
| 2-Decanone            | 20.365 | 1477 | 1482 | 0.99±0.12 <sup>a</sup>  | 0.42±0.07 <sup>b</sup>  | 0.29±0.06 <sup>b</sup>  | 0.33±0.08 <sup>b</sup>  | 0.26±0.04 <sup>b</sup>  |
| Geranylacetone        | 29.275 | 1842 | 1843 | 3.34±0.14 <sup>a</sup>  | 1.26±0.08 <sup>b</sup>  | 1.13±0.13 <sup>bc</sup> | 1.01±0.11 <sup>bc</sup> | 0.80±0.17 <sup>c</sup>  |
| trans-3-Nonen-2-one   | 33.77  | 2046 |      | 3.92±0.23 <sup>a</sup>  | 0.85±0.04 <sup>b</sup>  | 1.01±0.26 <sup>b</sup>  | 1.08±0.25 <sup>b</sup>  | 0.90±0.19 <sup>b</sup>  |
| <b>Furans</b>         |        |      |      |                         |                         |                         |                         |                         |
| 2-Pentylfuran         | 12.57  | 1221 | 1222 | 26.18±2.74 <sup>a</sup> | 14.29±1.50 <sup>b</sup> | 14.58±1.10 <sup>b</sup> | 15.61±0.55 <sup>b</sup> | 16.19±0.77 <sup>b</sup> |
| 2-Hexylfuran          | 15.725 | 1318 | 1323 | 0.65±0.11 <sup>a</sup>  | 0.18±0.02 <sup>b</sup>  | 0.12±0.01 <sup>b</sup>  | 0.17±0.03 <sup>b</sup>  | 0.13±0.01 <sup>b</sup>  |
| 2-Heptylfuran         | 18.76  | 1419 | 1429 | 0.79±0.04 <sup>a</sup>  | 0.16±0.03 <sup>bc</sup> | 0.11±0.02 <sup>c</sup>  | 0.17±0.02 <sup>bc</sup> | 0.23±0.03 <sup>b</sup>  |
| cis-Linalool oxide    | 18.91  | 1425 | 1425 | 6.43±0.32 <sup>a</sup>  | 2.05±0.17 <sup>b</sup>  | 2.21±0.13 <sup>b</sup>  | 2.11±0.12 <sup>b</sup>  | 2.01±0.24 <sup>b</sup>  |
| trans-Linalool oxide  | 19.695 | 1453 | 1452 | 4.09±0.23 <sup>a</sup>  | 1.72±0.22 <sup>b</sup>  | 1.66±0.20 <sup>b</sup>  | 1.73±0.15 <sup>b</sup>  | 1.53±0.08 <sup>b</sup>  |
| <b>Others</b>         |        |      |      |                         |                         |                         |                         |                         |
| Toluene               | 6.2    | 1033 | 1033 | 7.12±0.78 <sup>b</sup>  | 16.07±1.95 <sup>a</sup> | 9.23±0.35 <sup>b</sup>  | 8.67±0.50 <sup>b</sup>  | 7.78±0.42 <sup>b</sup>  |
| 1,3-dimethylbenzene   | 10.73  | 1167 | 1164 | 1.33±0.08 <sup>a</sup>  | 1.15±0.16 <sup>a</sup>  | 1.31±0.08 <sup>a</sup>  | 1.33±0.06 <sup>a</sup>  | 1.22±0.03 <sup>a</sup>  |
| N,N-Dimethylformamide | 15.23  | 1301 |      | 0.26±0.03 <sup>a</sup>  | 0.09±0.02 <sup>b</sup>  | 0.10±0.02 <sup>b</sup>  | 0.10±0.01 <sup>b</sup>  | 0.08±0.01 <sup>b</sup>  |
| 2-Methyl butyric Acid | 24.765 | 1650 | 1652 | 4.60±0.59 <sup>a</sup>  | 1.16±0.19 <sup>b</sup>  | 1.41±0.24 <sup>b</sup>  | 1.44±0.18 <sup>b</sup>  | 0.94±0.07 <sup>b</sup>  |
| Pentanoic acid        | 26.385 | 1718 | 1719 | 6.13±0.84 <sup>a</sup>  | 3.38±0.53 <sup>b</sup>  | 3.30±0.25 <sup>b</sup>  | 3.08±0.38 <sup>b</sup>  | 3.02±0.07 <sup>b</sup>  |
| Hexanoic acid         | 28.88  | 1825 | 1825 | 52.66±1.70 <sup>a</sup> | 15.71±3.73 <sup>b</sup> | 12.03±0.86 <sup>b</sup> | 11.23±1.36 <sup>b</sup> | 9.19±0.67 <sup>b</sup>  |
| Nonanoic acid         | 35.665 | 2137 | 2137 | 12.17±2.52 <sup>a</sup> | 1.53±0.30 <sup>b</sup>  | 1.53±0.19 <sup>b</sup>  | 0.75±0.10 <sup>b</sup>  | 1.17±0.21 <sup>b</sup>  |

<sup>1</sup> RI<sub>cal</sub>, the experimental Kovat's retention index calculated based on a DB-WAX capillary column.

<sup>2</sup> RI<sub>ref</sub>, the Kovats' retention index information obtained from the NIST Chemistry WebBook database (<https://webbook.nist.gov/chemistry/name-ser/>).

Data were presented as mean ± standard deviation. For each SS treatment time, values with different superscript letters in rows were significantly different ( $p < 0.05$ ).



|                         |        |      |      |                          |                         |                          |                          |                         |
|-------------------------|--------|------|------|--------------------------|-------------------------|--------------------------|--------------------------|-------------------------|
| Hexanal                 | 7.525  | 1072 | 1072 | 21.78±1.37 <sup>a</sup>  | 12.89±0.46 <sup>c</sup> | 11.08±0.72 <sup>cd</sup> | 10.33±0.29 <sup>d</sup>  | 15.49±2.15 <sup>b</sup> |
| Heptanal                | 10.955 | 1173 | 1176 | 3.30±0.06 <sup>a</sup>   | 1.49±0.21 <sup>bc</sup> | 1.32±0.10 <sup>bc</sup>  | 1.19±0.07 <sup>c</sup>   | 1.67±0.22 <sup>b</sup>  |
| 2-Hexenal               | 13.065 | 1236 | 1248 | 4.44±0.36 <sup>a</sup>   | 2.13±0.14 <sup>b</sup>  | 2.03±0.21 <sup>b</sup>   | 2.10±0.22 <sup>b</sup>   | 1.62±0.17 <sup>b</sup>  |
| Octanal                 | 14.34  | 1274 | 1275 | 5.02±0.14 <sup>a</sup>   | 1.65±0.04 <sup>bc</sup> | 1.80±0.13 <sup>b</sup>   | 1.42±0.09 <sup>bc</sup>  | 1.40±0.02 <sup>c</sup>  |
| trans-2-Heptenal        | 15.295 | 1303 | 1306 | 2.31±0.07 <sup>a</sup>   | 0.95±0.05 <sup>b</sup>  | 0.62±0.09 <sup>cd</sup>  | 0.77±0.14 <sup>bc</sup>  | 0.39±0.08 <sup>d</sup>  |
| Nonanal                 | 17.525 | 1377 | 1379 | 13.83±0.21 <sup>ab</sup> | 14.33±0.56 <sup>a</sup> | 14.40±1.08 <sup>ab</sup> | 12.89±0.50 <sup>ab</sup> | 12.17±0.18 <sup>b</sup> |
| trans-2-Octenal         | 18.445 | 1408 | 1412 | 4.28±0.52 <sup>a</sup>   | 0.68±0.07 <sup>b</sup>  | 0.78±0.12 <sup>b</sup>   | 0.73±0.11 <sup>b</sup>   | 0.80±0.12 <sup>b</sup>  |
| Decanal                 | 20.515 | 1483 | 1483 | 1.69±0.08 <sup>a</sup>   | 1.17±0.19 <sup>ab</sup> | 1.36±0.14 <sup>ab</sup>  | 1.47±0.17 <sup>a</sup>   | 0.98±0.16 <sup>b</sup>  |
| trans-2-Decenal         | 24.21  | 1627 | 1629 | 2.66±0.16 <sup>a</sup>   | 0.75±0.03 <sup>b</sup>  | 0.92±0.07 <sup>b</sup>   | 0.82±0.13 <sup>b</sup>   | 1.06±0.12 <sup>b</sup>  |
| 2-Undecenal             | 26.855 | 1738 | 1740 | 0.52±0.06 <sup>a</sup>   | 0.33±0.06 <sup>b</sup>  | 0.36±0.05 <sup>ab</sup>  | 0.41±0.04 <sup>ab</sup>  | 0.27±0.04 <sup>b</sup>  |
| <b>Esters</b>           |        |      |      |                          |                         |                          |                          |                         |
| Gamma-Hexanolactone     | 25.41  | 1677 | 1678 | 2.58±0.25 <sup>a</sup>   | 0.14±0.04 <sup>b</sup>  | 0.22±0.05 <sup>b</sup>   | 0.12±0.02 <sup>b</sup>   | 0.10±0.01 <sup>b</sup>  |
| Gamma-Octalactone       | 30.385 | 1891 | 1889 | 2.97±0.14 <sup>a</sup>   | 0.91±0.07 <sup>b</sup>  | 0.86±0.13 <sup>bc</sup>  | 0.71±0.05 <sup>bc</sup>  | 0.63±0.12 <sup>c</sup>  |
| Gamma-Nonanolactone     | 32.81  | 2000 | 2003 | 3.86±0.11 <sup>a</sup>   | 1.45±0.26 <sup>b</sup>  | 1.55±0.11 <sup>b</sup>   | 1.23±0.17 <sup>b</sup>   | 1.38±0.17 <sup>b</sup>  |
| Diisobutyl phthalate    | 42.575 | 2470 | 2526 | 0.49±0.09 <sup>bc</sup>  | 0.13±0.03 <sup>c</sup>  | 1.65±0.36 <sup>a</sup>   | 1.16±0.16 <sup>a</sup>   | 0.77±0.12 <sup>b</sup>  |
| Dibutyl phthalate       | 44.995 | 2586 | 2592 | 1.17±0.43 <sup>b</sup>   | 1.27±0.16 <sup>b</sup>  | 2.65±0.34 <sup>a</sup>   | 2.05±0.30 <sup>ab</sup>  | 2.66±0.44 <sup>a</sup>  |
| <b>Ketones</b>          |        |      |      |                          |                         |                          |                          |                         |
| 2-Heptanone             | 10.865 | 1171 | 1172 | 7.80±0.68 <sup>a</sup>   | 3.89±0.25 <sup>b</sup>  | 2.23±0.09 <sup>c</sup>   | 2.09±0.17 <sup>c</sup>   | 2.23±0.09 <sup>c</sup>  |
| 6-Methyl-2-heptanone    | 12.71  | 1225 | 1228 | 1.66±0.10 <sup>a</sup>   | 0.85±0.07 <sup>b</sup>  | 0.60±0.03 <sup>b</sup>   | 0.59±0.10 <sup>b</sup>   | 0.68±0.13 <sup>b</sup>  |
| 2-Octanone              | 14.21  | 1270 | 1275 | 4.50±0.36 <sup>a</sup>   | 2.45±0.06 <sup>b</sup>  | 2.19±0.12 <sup>b</sup>   | 2.18±0.25 <sup>b</sup>   | 1.14±0.18 <sup>c</sup>  |
| 1-Decen-3-one           | 14.71  | 1286 |      | 0.53±0.06 <sup>a</sup>   | 0.30±0.05 <sup>bc</sup> | 0.41±0.04 <sup>ab</sup>  | 0.35±0.08 <sup>bc</sup>  | 0.20±0.04 <sup>c</sup>  |
| 2,5-Octanedione         | 15.52  | 1311 | 1325 | 0.16±0.03 <sup>b</sup>   | 0.27±0.02 <sup>a</sup>  | 0.26±0.04 <sup>a</sup>   | 0.24±0.04 <sup>ab</sup>  | 0.21±0.04 <sup>ab</sup> |
| 6-Methyl-5-hepten-2-one | 15.825 | 1321 | 1323 | 17.68±1.55 <sup>a</sup>  | 9.40±0.10 <sup>b</sup>  | 7.75±0.40 <sup>bc</sup>  | 7.44±0.37 <sup>c</sup>   | 7.33±0.76 <sup>c</sup>  |
| 2,7-Octanedione         | 15.94  | 1325 |      | 0.55±0.07 <sup>a</sup>   | 0.15±0.02 <sup>b</sup>  | 0.08±0.01 <sup>b</sup>   | 0.10±0.02 <sup>b</sup>   | 0.17±0.01 <sup>b</sup>  |
| 2-Nonanone              | 17.385 | 1372 | 1374 | 1.32±0.08 <sup>a</sup>   | 0.56±0.03 <sup>b</sup>  | 0.50±0.05 <sup>b</sup>   | 0.43±0.07 <sup>b</sup>   | 0.40±0.01 <sup>b</sup>  |
| 2,15-Hexadecanedione    | 18.315 | 1403 |      | 2.62±0.48 <sup>a</sup>   | 0.39±0.07 <sup>b</sup>  | 0.38±0.04 <sup>b</sup>   | 0.81±0.07 <sup>b</sup>   | 0.34±0.06 <sup>b</sup>  |

|                       |        |      |      |                         |                         |                         |                         |                         |
|-----------------------|--------|------|------|-------------------------|-------------------------|-------------------------|-------------------------|-------------------------|
| 2-Decanone            | 20.365 | 1477 | 1482 | 0.99±0.12 <sup>a</sup>  | 0.26±0.05 <sup>c</sup>  | 0.47±0.04 <sup>b</sup>  | 0.24±0.06 <sup>c</sup>  | 0.40±0.04 <sup>bc</sup> |
| Geranylacetone        | 29.275 | 1842 | 1843 | 3.34±0.14 <sup>a</sup>  | 0.95±0.14 <sup>b</sup>  | 1.06±0.12 <sup>b</sup>  | 0.84±0.17 <sup>b</sup>  | 0.81±0.14 <sup>b</sup>  |
| trans-3-Nonen-2-one   | 33.77  | 2046 |      | 3.92±0.23 <sup>a</sup>  | 0.92±0.15 <sup>b</sup>  | 0.95±0.13 <sup>b</sup>  | 0.73±0.16 <sup>b</sup>  | 0.37±0.02 <sup>c</sup>  |
| <b>Furans</b>         |        |      |      |                         |                         |                         |                         |                         |
| 2-Pentylfuran         | 12.57  | 1221 | 1222 | 26.18±2.74 <sup>a</sup> | 13.95±0.37 <sup>b</sup> | 11.84±0.63 <sup>b</sup> | 12.30±0.76 <sup>b</sup> | 13.22±0.43 <sup>b</sup> |
| 2-Hexylfuran          | 15.725 | 1318 | 1323 | 0.65±0.11 <sup>a</sup>  | 0.16±0.03 <sup>bc</sup> | 0.22±0.03 <sup>b</sup>  | 0.21±0.04 <sup>bc</sup> | 0.13±0.01 <sup>c</sup>  |
| 2-Heptylfuran         | 18.76  | 1419 | 1429 | 0.79±0.04 <sup>a</sup>  | 0.14±0.01 <sup>bc</sup> | 0.18±0.04 <sup>b</sup>  | 0.07±0.01 <sup>c</sup>  | 0.12±0.02 <sup>bc</sup> |
| cis-Linalool oxide    | 18.91  | 1425 | 1425 | 6.43±0.32 <sup>a</sup>  | 2.41±0.12 <sup>b</sup>  | 2.37±0.18 <sup>bc</sup> | 1.92±0.11 <sup>cd</sup> | 1.51±0.17 <sup>d</sup>  |
| trans-Linalool oxide  | 19.695 | 1453 | 1452 | 4.09±0.23 <sup>a</sup>  | 1.73±0.09 <sup>b</sup>  | 1.88±0.09 <sup>b</sup>  | 1.57±0.08 <sup>b</sup>  | 1.19±0.13 <sup>c</sup>  |
| <b>Others</b>         |        |      |      |                         |                         |                         |                         |                         |
| Toluene               | 6.2    | 1033 | 1033 | 7.12±0.78 <sup>a</sup>  | 5.41±0.13 <sup>b</sup>  | 4.42±0.32 <sup>bc</sup> | 4.28±0.33 <sup>b</sup>  | 2.83±0.42 <sup>c</sup>  |
| 1,3-dimethylbenzene   | 10.73  | 1167 | 1164 | 1.33±0.08 <sup>a</sup>  | 1.25±0.09 <sup>a</sup>  | 1.33±0.09 <sup>a</sup>  | 1.40±0.08 <sup>a</sup>  | 1.23±0.03 <sup>a</sup>  |
| N,N-Dimethylformamide | 15.23  | 1301 |      | 0.26±0.03 <sup>a</sup>  | 0.08±0.01 <sup>c</sup>  | 0.08±0.01 <sup>c</sup>  | 0.10±0.01 <sup>c</sup>  | 0.17±0.02 <sup>b</sup>  |
| 2-Methyl butyric Acid | 24.765 | 1650 | 1652 | 4.60±0.59 <sup>a</sup>  | 1.21±0.12 <sup>b</sup>  | 1.48±0.16 <sup>b</sup>  | 1.53±0.05 <sup>b</sup>  | 1.23±0.17 <sup>b</sup>  |
| Pentanoic acid        | 26.385 | 1718 | 1719 | 6.13±0.84 <sup>a</sup>  | 2.79±0.25 <sup>c</sup>  | 3.63±0.12 <sup>b</sup>  | 2.89±0.31 <sup>bc</sup> | 3.21±0.25 <sup>bc</sup> |
| Hexanoic acid         | 28.88  | 1825 | 1825 | 52.66±1.70 <sup>a</sup> | 14.51±0.80 <sup>b</sup> | 16.06±1.19 <sup>b</sup> | 11.68±1.24 <sup>b</sup> | 15.15±1.62 <sup>b</sup> |
| Nonanoic acid         | 35.665 | 2137 | 2137 | 12.17±2.52 <sup>a</sup> | 1.03±0.19 <sup>d</sup>  | 9.00±0.61 <sup>b</sup>  | 2.38±0.61 <sup>d</sup>  | 5.65±0.67 <sup>c</sup>  |

<sup>1</sup> RI<sub>cal</sub>, the experimental Kovat's retention index calculated based on a DB-WAX capillary column.

<sup>2</sup> RI<sub>ref</sub>, the Kovats' retention index information obtained from the NIST Chemistry WebBook database (<https://webbook.nist.gov/chemistry/name-ser/>).

Data were presented as mean ± standard deviation. For each SS treatment time, values with different superscript letters in rows were significantly different ( $p < 0.05$ ).





|                         |        |      |      |                         |                         |                          |                          |                         |
|-------------------------|--------|------|------|-------------------------|-------------------------|--------------------------|--------------------------|-------------------------|
| Hexanal                 | 7.525  | 1072 | 1072 | 21.78±1.37 <sup>a</sup> | 12.91±1.32 <sup>c</sup> | 16.11±0.31 <sup>bc</sup> | 19.81±1.45 <sup>ab</sup> | 17.63±1.20 <sup>b</sup> |
| Heptanal                | 10.955 | 1173 | 1176 | 3.30±0.06 <sup>a</sup>  | 1.49±0.08 <sup>b</sup>  | 1.53±0.14 <sup>b</sup>   | 1.33±0.04 <sup>b</sup>   | 1.28±0.07 <sup>b</sup>  |
| 2-Hexenal               | 13.065 | 1236 | 1248 | 4.44±0.36 <sup>a</sup>  | 2.15±0.31 <sup>b</sup>  | 1.88±0.23 <sup>b</sup>   | 1.72±0.16 <sup>bc</sup>  | 1.19±0.10 <sup>c</sup>  |
| Octanal                 | 14.34  | 1274 | 1275 | 5.02±0.14 <sup>a</sup>  | 1.70±0.15 <sup>b</sup>  | 1.81±0.21 <sup>b</sup>   | 1.37±0.07 <sup>b</sup>   | 1.48±0.10 <sup>b</sup>  |
| trans-2-Heptenal        | 15.295 | 1303 | 1306 | 2.31±0.07 <sup>a</sup>  | 1.13±0.12 <sup>c</sup>  | 1.34±0.12 <sup>b</sup>   | 0.91±0.08 <sup>c</sup>   | 0.39±0.05 <sup>d</sup>  |
| Nonanal                 | 17.525 | 1377 | 1379 | 13.83±0.21 <sup>a</sup> | 13.88±1.25 <sup>a</sup> | 13.49±0.96 <sup>a</sup>  | 13.04±1.08 <sup>a</sup>  | 12.95±0.94 <sup>a</sup> |
| trans-2-Octenal         | 18.445 | 1408 | 1412 | 4.28±0.52 <sup>a</sup>  | 0.48±0.10 <sup>b</sup>  | 0.73±0.06 <sup>b</sup>   | 0.78±0.16 <sup>b</sup>   | 0.73±0.07 <sup>b</sup>  |
| Decanal                 | 20.515 | 1483 | 1483 | 1.69±0.08 <sup>a</sup>  | 1.46±0.32 <sup>ab</sup> | 1.18±0.13 <sup>ab</sup>  | 1.01±0.21 <sup>b</sup>   | 1.00±0.10 <sup>b</sup>  |
| trans-2-Decenal         | 24.21  | 1627 | 1629 | 2.66±0.16 <sup>a</sup>  | 1.47±0.40 <sup>b</sup>  | 0.90±0.12 <sup>b</sup>   | 0.99±0.09 <sup>b</sup>   | 1.31±0.17 <sup>b</sup>  |
| 2-Undecenal             | 26.855 | 1738 | 1740 | 0.52±0.06 <sup>a</sup>  | 0.09±0.01 <sup>c</sup>  | 0.24±0.04 <sup>b</sup>   | 0.28±0.06 <sup>b</sup>   | 0.10±0.03 <sup>c</sup>  |
| <b>Esters</b>           |        |      |      |                         |                         |                          |                          |                         |
| Gamma-Hexanolactone     | 25.41  | 1677 | 1678 | 2.58±0.25 <sup>a</sup>  | 0.21±0.04 <sup>b</sup>  | 0.17±0.02 <sup>b</sup>   | 0.11±0.02 <sup>b</sup>   | 0.13±0.00 <sup>b</sup>  |
| Gamma-Octalactone       | 30.385 | 1891 | 1889 | 2.97±0.14 <sup>a</sup>  | 0.70±0.12 <sup>b</sup>  | 0.60±0.11 <sup>b</sup>   | 0.26±0.03 <sup>c</sup>   | 0.29±0.06 <sup>c</sup>  |
| Gamma-Nonanolactone     | 32.81  | 2000 | 2003 | 3.86±0.11 <sup>a</sup>  | 1.48±0.25 <sup>b</sup>  | 1.25±0.22 <sup>bc</sup>  | 0.91±0.06 <sup>c</sup>   | 0.96±0.15 <sup>c</sup>  |
| Diisobutyl phthalate    | 42.575 | 2470 | 2526 | 0.49±0.09 <sup>a</sup>  | 0.67±0.04 <sup>a</sup>  | 0.68±0.13 <sup>a</sup>   | 0.79±0.21 <sup>a</sup>   | 0.60±0.07 <sup>a</sup>  |
| Dibutyl phthalate       | 44.995 | 2586 | 2592 | 1.17±0.43 <sup>b</sup>  | 2.80±0.29 <sup>a</sup>  | 2.73±0.43 <sup>a</sup>   | 2.62±0.26 <sup>a</sup>   | 1.66±0.16 <sup>b</sup>  |
| <b>Ketones</b>          |        |      |      |                         |                         |                          |                          |                         |
| 2-Heptanone             | 10.865 | 1171 | 1172 | 7.80±0.68 <sup>a</sup>  | 2.05±0.10 <sup>b</sup>  | 2.14±0.09 <sup>b</sup>   | 2.47±0.10 <sup>b</sup>   | 2.05±0.14 <sup>b</sup>  |
| 6-Methyl-2-heptanone    | 12.71  | 1225 | 1228 | 1.66±0.10 <sup>a</sup>  | 0.67±0.11 <sup>b</sup>  | 0.73±0.11 <sup>b</sup>   | 0.85±0.08 <sup>b</sup>   | 0.84±0.08 <sup>b</sup>  |
| 2-Octanone              | 14.21  | 1270 | 1275 | 4.50±0.36 <sup>a</sup>  | 2.08±0.18 <sup>b</sup>  | 1.86±0.18 <sup>b</sup>   | 1.47±0.09 <sup>c</sup>   | 1.29±0.08 <sup>c</sup>  |
| 1-Decen-3-one           | 14.71  | 1286 |      | 0.53±0.06 <sup>a</sup>  | 0.30±0.06 <sup>b</sup>  | 0.17±0.02 <sup>b</sup>   | 0.17±0.01 <sup>b</sup>   | 0.25±0.04 <sup>b</sup>  |
| 2,5-Octanedione         | 15.52  | 1311 | 1325 | 0.16±0.03 <sup>a</sup>  | 0.24±0.03 <sup>a</sup>  | 0.26±0.02 <sup>a</sup>   | 0.19±0.03 <sup>a</sup>   | 0.19±0.09 <sup>a</sup>  |
| 6-Methyl-5-hepten-2-one | 15.825 | 1321 | 1323 | 17.68±1.55 <sup>a</sup> | 7.64±0.47 <sup>b</sup>  | 7.41±0.34 <sup>bc</sup>  | 7.10±0.33 <sup>bc</sup>  | 6.07±0.25 <sup>c</sup>  |
| 2,7-Octanedione         | 15.94  | 1325 |      | 0.55±0.07 <sup>a</sup>  | 0.04±0.01 <sup>b</sup>  | 0.13±0.02 <sup>b</sup>   | 0.06±0.01 <sup>b</sup>   | 0.08±0.01 <sup>b</sup>  |
| 2-Nonanone              | 17.385 | 1372 | 1374 | 1.32±0.08 <sup>a</sup>  | 0.49±0.03 <sup>b</sup>  | 0.50±0.06 <sup>b</sup>   | 0.45±0.03 <sup>b</sup>   | 0.40±0.06 <sup>b</sup>  |
| 2,15-Hexadecanedione    | 18.315 | 1403 |      | 2.62±0.48 <sup>a</sup>  | 0.71±0.08 <sup>b</sup>  | 0.47±0.10 <sup>b</sup>   | 0.85±0.17 <sup>b</sup>   | 0.81±0.11 <sup>b</sup>  |

|                       |        |      |      |                         |                         |                          |                         |                         |
|-----------------------|--------|------|------|-------------------------|-------------------------|--------------------------|-------------------------|-------------------------|
| 2-Decanone            | 20.365 | 1477 | 1482 | 0.99±0.12 <sup>a</sup>  | 0.48±0.06 <sup>c</sup>  | 0.20±0.04 <sup>d</sup>   | 0.23±0.03 <sup>d</sup>  | 0.64±0.10 <sup>b</sup>  |
| Geranylacetone        | 29.275 | 1842 | 1843 | 3.34±0.14 <sup>a</sup>  | 0.99±0.25 <sup>b</sup>  | 0.98±0.25 <sup>b</sup>   | 0.64±0.15 <sup>bc</sup> | 0.46±0.07 <sup>c</sup>  |
| trans-3-Nonen-2-one   | 33.77  | 2046 |      | 3.92±0.23 <sup>a</sup>  | 0.74±0.04 <sup>b</sup>  | 0.67±0.07 <sup>b</sup>   | 0.42±0.06 <sup>b</sup>  | 0.57±0.08 <sup>b</sup>  |
| <b>Furans</b>         |        |      |      |                         |                         |                          |                         |                         |
| 2-Pentylfuran         | 12.57  | 1221 | 1222 | 26.18±2.74 <sup>a</sup> | 11.76±0.91 <sup>b</sup> | 12.46±0.18 <sup>b</sup>  | 12.61±0.49 <sup>b</sup> | 12.75±0.76 <sup>b</sup> |
| 2-Hexylfuran          | 15.725 | 1318 | 1323 | 0.65±0.11 <sup>a</sup>  | 0.10±0.02 <sup>b</sup>  | 0.12±0.02 <sup>b</sup>   | 0.11±0.02 <sup>b</sup>  | 0.12±0.02 <sup>b</sup>  |
| 2-Heptylfuran         | 18.76  | 1419 | 1429 | 0.79±0.04 <sup>a</sup>  | 0.15±0.03 <sup>c</sup>  | 0.25±0.05 <sup>b</sup>   | 0.17±0.03 <sup>c</sup>  | 0.17±0.01 <sup>bc</sup> |
| cis-Linalool oxide    | 18.91  | 1425 | 1425 | 6.43±0.32 <sup>a</sup>  | 2.05±0.14 <sup>bc</sup> | 2.20±0.15 <sup>b</sup>   | 1.87±0.16 <sup>c</sup>  | 1.75±0.14 <sup>c</sup>  |
| trans-Linalool oxide  | 19.695 | 1453 | 1452 | 4.09±0.23 <sup>a</sup>  | 1.67±0.18 <sup>b</sup>  | 1.57±0.13 <sup>bc</sup>  | 1.28±0.05 <sup>bc</sup> | 1.13±0.08 <sup>c</sup>  |
| <b>Others</b>         |        |      |      |                         |                         |                          |                         |                         |
| Toluene               | 6.2    | 1033 | 1033 | 7.12±0.78 <sup>a</sup>  | 2.56±0.14 <sup>b</sup>  | 2.26±0.11 <sup>b</sup>   | 2.43±0.31 <sup>b</sup>  | 2.15±0.29 <sup>b</sup>  |
| 1,3-dimethylbenzene   | 10.73  | 1167 | 1164 | 1.33±0.08 <sup>a</sup>  | 1.30±0.03 <sup>a</sup>  | 1.35±0.13 <sup>ab</sup>  | 1.13±0.10 <sup>b</sup>  | 1.25±0.10 <sup>ab</sup> |
| N,N-Dimethylformamide | 15.23  | 1301 |      | 0.26±0.03 <sup>a</sup>  | 0.11±0.03 <sup>b</sup>  | 0.09±0.03 <sup>b</sup>   | 0.12±0.03 <sup>b</sup>  | 0.15±0.03 <sup>b</sup>  |
| 2-Methyl butyric Acid | 24.765 | 1650 | 1652 | 4.60±0.59 <sup>a</sup>  | 0.99±0.15 <sup>b</sup>  | 1.46±0.28 <sup>b</sup>   | 1.31±0.11 <sup>b</sup>  | 1.07±0.24 <sup>b</sup>  |
| Pentanoic acid        | 26.385 | 1718 | 1719 | 6.13±0.84 <sup>a</sup>  | 3.17±0.26 <sup>b</sup>  | 2.44±0.19 <sup>bc</sup>  | 2.03±0.26 <sup>c</sup>  | 1.86±0.10 <sup>c</sup>  |
| Hexanoic acid         | 28.88  | 1825 | 1825 | 52.66±1.70 <sup>a</sup> | 15.68±1.34 <sup>b</sup> | 14.57±0.92 <sup>bc</sup> | 10.65±1.44 <sup>c</sup> | 10.30±0.13 <sup>c</sup> |
| Nonanoic acid         | 35.665 | 2137 | 2137 | 12.17±2.52 <sup>a</sup> | 1.06±0.25 <sup>b</sup>  | 1.43±0.24 <sup>b</sup>   | 1.16±0.26 <sup>b</sup>  | 0.39±0.08 <sup>b</sup>  |

<sup>1</sup> RI<sub>cal</sub>, the experimental Kovat's retention index calculated based on a DB-WAX capillary column.

<sup>2</sup> RI<sub>ref</sub>, the Kovats' retention index information obtained from the NIST Chemistry WebBook database (<https://webbook.nist.gov/chemistry/name-ser/>).

Data were presented as mean ± standard deviation. For each SS treatment time, values with different superscript letters in rows were significantly different ( $p < 0.05$ ).
